# Supplementary material for: Cognitive decline among older adults with heart diseases before and during the COVID-19 pandemic: A longitudinal cohort study
Source: PubMed Central journal article supplement (PMC9908755; doi:10.3389/fcvm.2022.1077800), 2023-01-26

## *Supplementary Material*

**Supplementary Figure 1.** Flowchart of participants selection.

**Supplementary Table 1.** Comparison of baseline characteristics between participants included (n=9304) and excluded (n=7842).

**Supplementary Figure 2.** Subgroup analyses on the differences in global cognitive scores between people with and without heart diseases during the pandemic period compared with those during the pre-pandemic period.

**Supplementary Figure 1. Flowchart of participants selection**

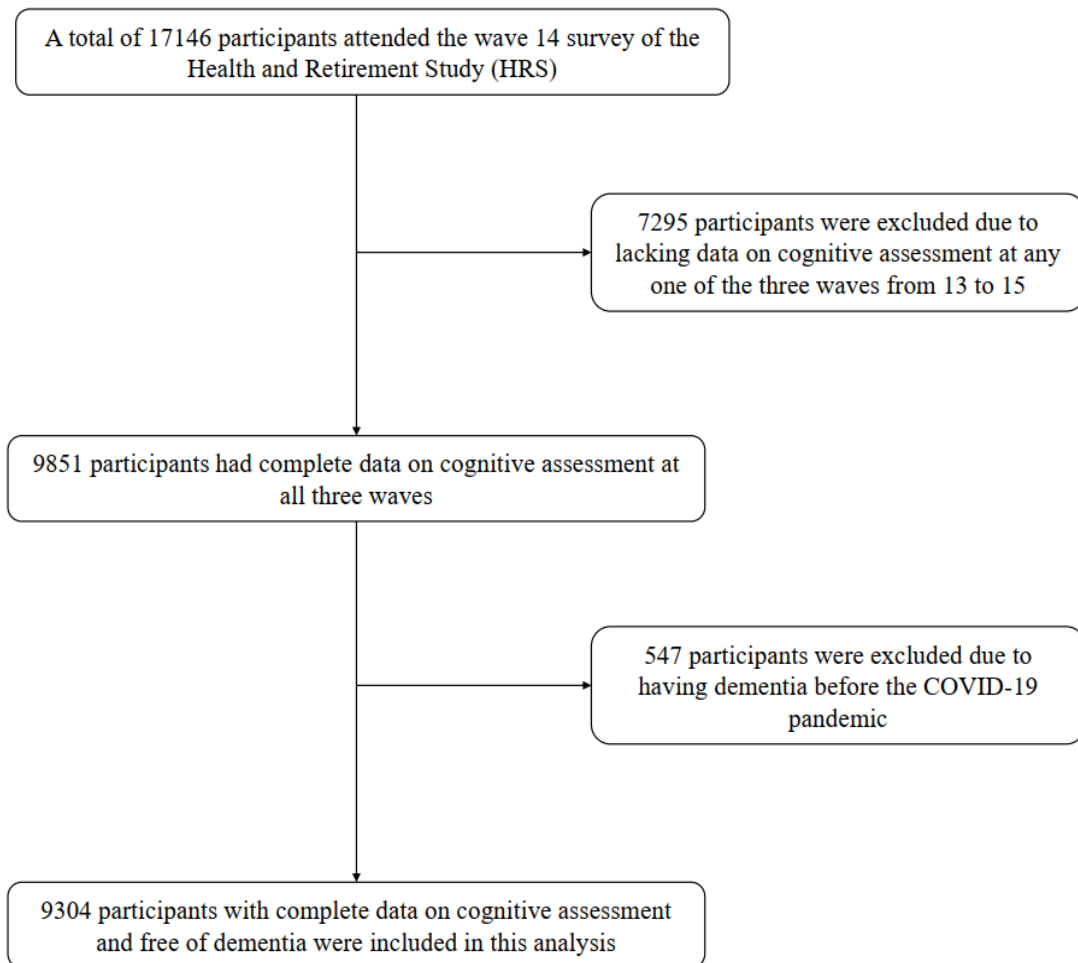

**Supplementary Table 1. Comparison of baseline characteristics between participants included (n=9304) and excluded (n=7842)**

| <b>Characteristics</b>         | <b>Included participants (n=9304)</b> | <b>Exclude participants (n=7842)</b> | <b>P*</b> |
|--------------------------------|---------------------------------------|--------------------------------------|-----------|
| Heart diseases (%)             | 2119 (22.8)                           | 2124 (27.1)                          | <0.001    |
| Age (years)                    | 65.8 ± 10.8                           | 68.4 ± 11.9                          | <0.001    |
| Female (%)                     | 5655 (60.8)                           | 4461 (56.9)                          | <0.001    |
| White (%)                      | 5825 (62.9)                           | 5470 (70.0)                          | 0.001     |
| High educational level (%)     | 7506 (80.7)                           | 6310 (80.5)                          | 0.728     |
| Living alone (%)               | 3521 (37.8)                           | 3163 (40.3)                          | <0.001    |
| Current smoking (%)            | 1259 (13.5)                           | 989 (12.6)                           | 0.079     |
| Current drinking (%)           | 3612 (39.0)                           | 3053 (39.1)                          | 0.863     |
| Physical active (%)            | 6562 (70.5)                           | 5097 (65.0)                          | <0.001    |
| Depressive symptoms (%)        | 1297 (13.9)                           | 1190 (15.2)                          | 0.024     |
| <b>Chronic diseases status</b> |                                       |                                      |           |
| Hypertension (%)               | 6268 (67.4)                           | 5342 (68.1)                          | 0.302     |
| Diabetes (%)                   | 2943 (31.6)                           | 2362 (30.1)                          | 0.034     |
| Stroke (%)                     | 701 (7.5)                             | 887 (11.3%)                          | <0.001    |
| Cancer (%)                     | 1292 (13.9)                           | 1367 (17.5)                          | <0.001    |
| Chronic lung diseases (%)      | 971 (10.4)                            | 989 (12.7)                           | <0.001    |

Values were presented as mean ± SD, or n (%).

\* The differences between included participants and excluded participants were tested using the t-test or chi-square test.

**Supplementary Figure 2. Subgroup analyses on the differences in global cognitive scores between people with and without heart diseases during the pandemic period compared with those during the pre-pandemic period.**

\* The participant self, or his relatives or friends had been diagnosed with COVID-19.

† Calculated by linear mixed model, after adjusting for age, sex, race, education, cohabitation status, current smoking, current drinking, physical active, depressive symptoms, status of hypertension, diabetes, stroke, cancer and chronic lung diseases, except where the adjusting variable itself being tested.

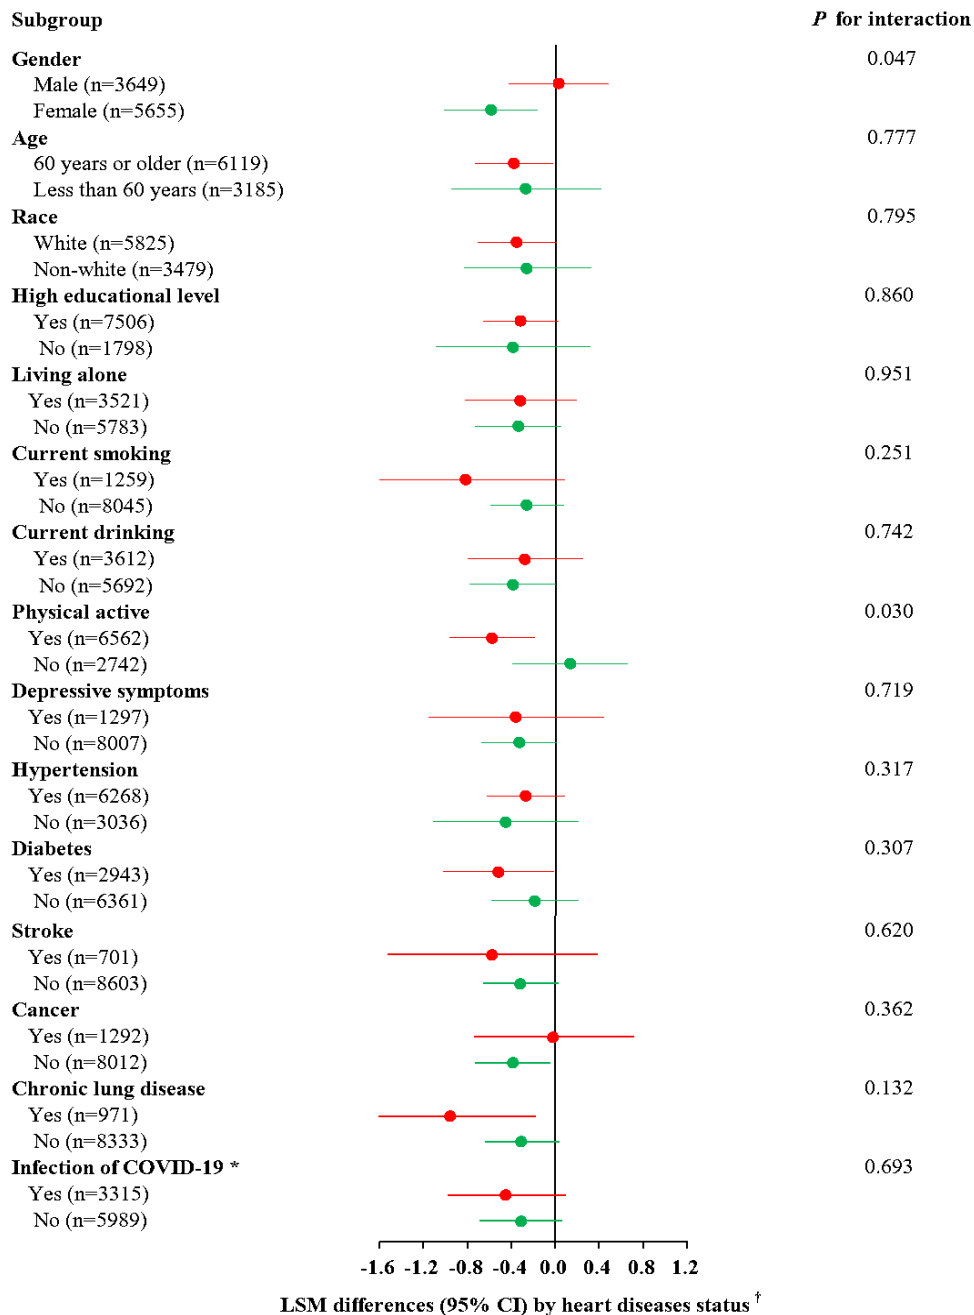

Supplement: Data_Sheet_1.pdf [file Data_Sheet_1.pdf]
